# Supplementary material for: Rhizophora mucronata Lam. (Mangrove) Bark Extract Reduces Ethanol-Induced Liver Cell Death and Oxidative Stress in Swiss Albino Mice: In Vivo and In Silico Studies
Source: MDPI journal article supplement (doi:10.3390/metabo12111021), 2022-10-25
Supplement: s1 [file s1]

Factory address: E-43 & E3/14, MIDC, Kupwad block, Sangli, Maharashtra-416436

## AF-1000M Rat & Mice Diets (Autoclavable)

### CERTIFICATE OF ANALYSIS

| <b>Lot No : 223</b><br><br><b>Date of manufacture: 08.04.2022</b><br><br><b>Expiry date: 07.10.2022</b><br><br><b>Report date: 09.04.2022</b><br><br><br><br><br><b>Authorized signatory</b> | Proximate analysis |             |
|----------------------------------------------------------------------------------------------------------------------------------------------------------------------------------------------------------------------------------------------------------------------------------------------------------------------------------------------------------------|--------------------|-------------|
|                                                                                                                                                                                                                                                                                                                                                                | Analysis           | Result %    |
|                                                                                                                                                                                                                                                                                                                                                                | Crude Protein      | 17.45       |
|                                                                                                                                                                                                                                                                                                                                                                | Ether extract      | 4.16        |
|                                                                                                                                                                                                                                                                                                                                                                | Crude Fiber        | 4.08        |
|                                                                                                                                                                                                                                                                                                                                                                | Moisture           | 8.95        |
|                                                                                                                                                                                                                                                                                                                                                                | Calcium            | 0.88        |
|                                                                                                                                                                                                                                                                                                                                                                | Phosphorus         | 0.67        |
|                                                                                                                                                                                                                                                                                                                                                                | Total ash          | 8.92        |
|                                                                                                                                                                                                                                                                                                                                                                | Gross Energy       | 3.0 Kcal/gm |

Consolidated results obtained from one or more independent testing laboratories.

| Analysis                     | Result   | Units  | Established Maximum concentration |
|------------------------------|----------|--------|-----------------------------------|
| <b>Heavy Metals</b>          |          |        |                                   |
| Arsenic                      | 0.15     | ppm    | 1.00                              |
| Cadmium                      | 0.05     | ppm    | 0.50                              |
| Lead                         | 0.10     | ppm    | 1.50                              |
| Mercury                      | 0.02     | ppm    | 0.20                              |
| <b>Mycotoxins</b>            |          |        |                                   |
| Aflatoxin B1, B2, G1, G2     | <5.00    | ppb    | 5.00                              |
| Chlorinated Hydrocarbons     | <0.01    | ppm    | 0.05                              |
| Organophosphates             | <0.10    | ppm    | 0.5                               |
| Phytoestrogen                | Complies | µg/g   | 12                                |
| <b>Microbial Examination</b> |          |        |                                   |
| Total Aerobic Count          | Complies | CFU/gm | <1x10 <sup>3</sup> CFU/gm         |
| Mold Count                   | Absent   | CFU/gm | Absent/10 gm                      |
| Escherichia coli             | Absent   | CFU/gm | Absent/10 gm                      |
| Salmonella                   | Absent   | CFU/gm | Absent/10 gm                      |
| Shigella                     | Absent   | CFU/gm | Absent/10 gm                      |
| Pseudomonas aeruginosa       | Absent   | CFU/gm | Absent/10 gm                      |

QC/F/ 05,00,1.1.2020
